# Supplementary material for: Competing for the same value segments? Insight into the volatile Dutch political landscape
Source: PubMed Central journal article supplement (PMC5764305; doi:10.1371/journal.pone.0190598), 2018-01-11
Supplement: pone.0190598.s001.pdf [file pone.0190598.s001.pdf]

## Bilinear Decompositions in the LC-BML Model

We now describe the bilinear decomposition of the parameters used in the LC-BML model. In order to reduce the number of parameters in Eq. (3) from the main text, which reads

$$\eta_{ijk|r,s} = \alpha_{k|r} + \sum_{l=1}^L \beta'_{kl} \mathbf{x}_{il} + \gamma_{jk|s}, \quad (1)$$

[1] introduce bilinear decompositions which also make it possible to display all effects in  $P$ -dimensional graphs. Let  $\mathbf{B}_l$  be the matrix with  $\beta_{1l}, \dots, \beta_{Kl}$  as rows, and gather the  $\gamma_{jk|s}$  in the  $J \times K$  matrix  $\mathbf{\Gamma}_s$ . The bilinear restrictions are imposed by requiring that

$$\mathbf{B}_l = \mathbf{F}\mathbf{G}'_l \text{ and } \mathbf{\Gamma}'_s = \mathbf{F}\mathbf{H}'_s, \quad (2)$$

where  $\mathbf{F}$ ,  $\mathbf{G}_l$  and  $\mathbf{H}_s$  has  $P$  columns. Typically, the dimensionality of the graphical representations is chosen to be  $P = 1, 2$  or  $3$  so that it can be displayed easily. The matrix  $\mathbf{F}$  contains the coordinates of the  $K$  rating categories,  $\mathbf{G}_l$  the coordinates for the categories of socio-demographic variable  $l$ , and  $\mathbf{H}_s$  the coordinates of the  $J$  items in value segment  $s$  in  $P$ -dimensional space. Under these bilinear restrictions, Eq. (1) becomes

$$\eta_{ijk|r,s} = \alpha_{k|r} + \sum_{l=1}^L \sum_{p=1}^P f_{kp} \mathbf{g}'_{lp} \mathbf{x}_{il} + \sum_{p=1}^P f_{kp} h_{jp|s}, \quad (3)$$

with  $f_{kp}$  and  $h_{tp|s}$  being the elements of  $\mathbf{F}$  and  $\mathbf{H}_s$  respectively, and  $\mathbf{g}_{lp}$  the  $p$ th column of  $\mathbf{G}_l$ . Besides these bilinear restrictions, several identifiability constraints must be imposed on the parameters in Eq. (3) – details are given in [1].

## References

- [1] Van Rosmalen, Joost, Hester Van Herk, and Patrick JF Groenen, 2010. “Identifying Response Styles: A Latent-Class Bilinear Multinomial Logit Model.” *Journal of Marketing Research* 47:157–172.
