# Supplementary material for: Competing for the same value segments? Insight into the volatile Dutch political landscape
Source: PubMed Central journal article supplement (PMC5764305; doi:10.1371/journal.pone.0190598), 2018-01-11
Supplement: pone.0190598.s002.pdf [file pone.0190598.s002.pdf]

| Value          | Code | Item                                                                                                                                               | Description         | Average |
|----------------|------|----------------------------------------------------------------------------------------------------------------------------------------------------|---------------------|---------|
| Benevolence    | BE1  | It's very important to him to help the people around him. He wants to care for their well-being.                                                   | Help others         | 2.27    |
|                | BE2  | It is important to her to be loyal to her friends. She wants to devote herself to people close to her.                                             | Loyalty             | 2.16    |
| Universalism   | UN1  | He thinks it is important that every person in the world should be treated equally. He believes everyone should have equal opportunities in life.  | Equality            | 2.11    |
|                | UN2  | It is important to him to listen to people who are different from him. Even when he disagrees with them, he still wants to understand them.        | Understand others   | 2.43    |
|                | UN3  | She strongly believes that people should care for nature. Looking after the environment is important to her.                                       | Care for nature     | 2.31    |
| Self-Direction | SD1  | It is important to her to make her own decisions about what she does. She likes to be free and not depend on others.                               | Independent         | 2.11    |
|                | SD2  | Thinking up new ideas and being creative is important to her. She likes to do things in her own original way.                                      | Creative            | 2.46    |
| Stimulation    | ST1  | He likes surprises and is always looking for new things to do. He thinks it is important to do lots of different things in life.                   | Look for new things | 2.85    |
|                | ST2  | He looks for adventures and likes to take risks. He wants to have an exciting life.                                                                | Excitement          | 3.72    |
| Hedonism       | HE1  | Having a good time is important to her. She likes to spoil herself.                                                                                | Have a good time    | 3.04    |
|                | HE2  | He seeks every chance he can to have fun. It is important to him to do things that give him pleasure.                                              | Have fun            | 2.52    |
| Achievement    | AC1  | It's important to her to show her abilities. She wants people to admire what she does.                                                             | Be admired          | 3.27    |
|                | AC2  | Being very successful is important to him. He hopes people will recognise his achievements.                                                        | Be successful       | 3.26    |
| Power          | PO1  | It is important to her to be rich. She wants to have a lot of money and expensive things.                                                          | Be rich             | 4.18    |
|                | PO2  | It is important to her to get respect from others. She wants people to do what she says.                                                           | Get respect         | 3.40    |
| Security       | SE1  | It is important to him to live in secure surroundings. He avoids anything that might endanger his safety.                                          | Security            | 2.80    |
|                | SE2  | It is important to her that the government ensures her safety against all threats. She wants the state to be strong so it can defend its citizens. | Strong government   | 2.73    |
| Conformity     | CO1  | He believes that people should do what they're told. He thinks people should follow rules at all times, even when no-one is watching.              | Follow rules        | 2.95    |
|                | CO2  | It is important to her always to behave properly. She wants to avoid doing anything people would say is wrong.                                     | Behave properly     | 2.85    |
| Tradition      | TR1  | Tradition is important to her. She tries to follow the customs handed down by her religion or her family.                                          | Tradition           | 2.86    |
|                | TR2  | It is important to him to be humble and modest. He tries not to draw attention to himself.                                                         | Modesty             | 3.29    |

Table S2.1: The 21 value items from the ESS and their weighted average ratings for the Dutch sample. The unadjusted post-stratification weights supplied in the ESS were used to calculate the weighted averages. A six point scale was employed, with one being the highest possible score, and six being the lowest possible score.
