# Supplementary material for: Competing for the same value segments? Insight into the volatile Dutch political landscape
Source: PubMed Central journal article supplement (PMC5764305; doi:10.1371/journal.pone.0190598), 2018-01-11
Supplement: pone.0190598.s003.pdf [file pone.0190598.s003.pdf]

| Party         | Election   |            |            |            |            |            |
|---------------|------------|------------|------------|------------|------------|------------|
|               | 2002       | 2003       | 2006       | 2010       | 2012       | 2017       |
| VVD           | 15.4       | 17.9       | 14.7       | 20.5       | 26.6       | 21.3       |
| PvdA          | 15.1       | 27.3       | 21.2       | 19.6       | 24.8       | 5.7        |
| PVV           | –          | –          | 5.9        | 15.4       | 10.1       | 13.1       |
| CDA           | 27.9       | 28.6       | 26.5       | 13.6       | 8.5        | 12.4       |
| SP            | 5.9        | 6.3        | 16.6       | 9.8        | 9.7        | 9.1        |
| D66           | 5.1        | 4.1        | 2.0        | 6.9        | 8.0        | 12.2       |
| GL            | 7.0        | 5.1        | 4.6        | 6.7        | 2.3        | 9.1        |
| CU            | 2.5        | 2.1        | 4.0        | 3.2        | 3.1        | 3.4        |
| SGP           | 1.7        | 1.6        | 1.6        | 1.7        | 2.1        | 2.1        |
| PvdD          | –          | 0.5        | 1.8        | 1.3        | 1.9        | 3.2        |
| 50PLUS        | –          | –          | –          | –          | 1.9        | 3.1        |
| TON           | –          | –          | –          | 0.6        | –          | –          |
| LPF           | 17.0       | 5.7        | 0.2        | –          | –          | –          |
| LN            | 1.6        | 0.4        | –          | –          | –          | –          |
| DENK          | –          | –          | –          | –          | –          | 2.1        |
| FvD           | –          | –          | –          | –          | –          | 1.8        |
| Other         | 0.7        | 0.4        | 1.0        | 0.5        | 0.9        | 1.5        |
| Valid votes   | 9 501 152  | 9 654 475  | 9 838 683  | 9 416 001  | 9 424 235  | 10 516 041 |
| Blank/Invalid | 14 074     | 12 127     | 16 315     | 26 976     | 37 988     | 47 415     |
| Total votes   | 9 515 226  | 9 666 602  | 9 854 998  | 9 442 977  | 9 462 223  | 10 563 456 |
| Electorate    | 12 035 935 | 12 076 711 | 12 264 503 | 12 524 152 | 12 689 810 | 12 893 466 |
| Turnout       | 79.1%      | 80%        | 80.4%      | 75.4%      | 74.6%      | 81.9%      |

Table S3.1: The percentage of votes won by the different political parties in the six Dutch elections, as well as the total number of votes cast and the size of the electorate. (Source: [www.verkiezingsuitslagen.nl](http://www.verkiezingsuitslagen.nl))
